# Supplementary material for: A Data-Driven Approach to Construct a Molecular Map of Trypanosoma cruzi to Identify Drugs and Vaccine Targets
Source: MDPI journal article supplement (doi:10.3390/vaccines11020267), 2023-01-26
Supplement: s1 [file s1]

**Supplementary Table 27 a: Standard parameters of *T.cruzi* pathways map determined using the network analyzer Cytoscape plugin.** This table has information in 2 columns: Type and Statistics. The first column 'Type' provides the type of the parameter; The second column 'Statistics' provides the value of the parameter measured using Cytoscape.

| S.No. | Type                        | Statistics |
|-------|-----------------------------|------------|
| 1     | Number of nodes             | 1929       |
| 2     | Number of edges             | 2088       |
| 3     | Average number of neighbors | 2.183      |
| 4     | Network Diameter            | 28         |
| 5     | Network Radius              | 14         |
| 6     | Characteristics path length | 11.735     |
| 7     | Clustering coefficient      | 0.000      |
| 8     | Network density             | 0.014      |
| 9     | Connected components        | 0.728      |
| 10    | Multi-edge node pair        | 0.085      |
| 11    | Number of self-loops        | 192        |
| 12    | Analysis time (sec.)        | 0.060      |

**Supplementary Table 27 b: Standard parameters of *T.cruzi* molecular map determined using the network analyzer Cytoscape plugin.** This table has information in 2 columns: Type and Statistics. The first column 'Type' provides the type of the parameter; The second column 'Statistics' provides the value of the parameter measured using Cytoscape.

| S.No. | Type                        | Statistics |
|-------|-----------------------------|------------|
| 1     | Number of nodes             | 4016       |
| 2     | Number of edges             | 3468       |
| 3     | Average number of neighbors | 2.024      |
| 4     | Network Diameter            | 22         |
| 5     | Network Radius              | 11         |
| 6     | Characteristics path length | 8.332      |
| 7     | Clustering coefficient      | 0.000      |
| 8     | Network density             | 0.025      |
| 9     | Connected components        | 0.556      |
| 10    | Multi-edge node pair        | 0.101      |
| 11    | Number of self-loops        | 812        |
| 12    | Analysis time (sec.)        | 0.133      |

**Supplementary Table 27 c: Standard parameters of *T.cruzi* drug map determined using the network analyzer Cytoscape plugin.** This table has information in 2 columns: Type and Statistics. The first column 'Type' provides the type of the parameter; The second column 'Statistics' provides the value of the parameter measured using Cytoscape.

| S.No. | Type                        | Statistics |
|-------|-----------------------------|------------|
| 1     | Number of nodes             | 51         |
| 2     | Number of edges             | 52         |
| 3     | Average number of neighbors | 2.039      |
| 4     | Network Diameter            | 18         |
| 5     | Network Radius              | 9          |
| 6     | Characteristics path length | 6.915      |
| 7     | Clustering coefficient      | 0.000      |
| 8     | Network density             | 0.041      |
| 9     | Connected components        | 0.412      |
| 10    | Multi-edge node pair        | 0.062      |
| 11    | Number of self loops        | 1          |
| 12    | Analysis time (sec.)        | 0.019      |
